# Supplementary material for: The Effect of Plant-Derived Low-Ratio Linoleic Acid/α-Linolenic Acid on Markers of Glucose Controls: A Systematic Review and Meta-Analysis
Source: MDPI journal article supplement (doi:10.3390/ijms241814383), 2023-09-21
Supplement: s1 [file s1]

**Supplementary Table S1.** Search strategy.

| PubMed/MEDLINE                                                                                                                                                                                                                                                                                                                                                                                                                                                                                                                                                                                                                                                                                                                                                                                                                                                                                      | Scopus                                                                                                                                                                                                                                                                                                                                                                                                                                                                                                                                                                                                                                                                                                                                                                                                                                                                                                                                                                                      | Web of Science                                                                                                                                                                                                                                                                                                                                                                                                                                                                                                                                                                                                                                                      | Embase                                                                                                                                                                                                                                                                                                                                                                                                                                                                                                                                                                                                                                                                                                                                  |
|-----------------------------------------------------------------------------------------------------------------------------------------------------------------------------------------------------------------------------------------------------------------------------------------------------------------------------------------------------------------------------------------------------------------------------------------------------------------------------------------------------------------------------------------------------------------------------------------------------------------------------------------------------------------------------------------------------------------------------------------------------------------------------------------------------------------------------------------------------------------------------------------------------|---------------------------------------------------------------------------------------------------------------------------------------------------------------------------------------------------------------------------------------------------------------------------------------------------------------------------------------------------------------------------------------------------------------------------------------------------------------------------------------------------------------------------------------------------------------------------------------------------------------------------------------------------------------------------------------------------------------------------------------------------------------------------------------------------------------------------------------------------------------------------------------------------------------------------------------------------------------------------------------------|---------------------------------------------------------------------------------------------------------------------------------------------------------------------------------------------------------------------------------------------------------------------------------------------------------------------------------------------------------------------------------------------------------------------------------------------------------------------------------------------------------------------------------------------------------------------------------------------------------------------------------------------------------------------|-----------------------------------------------------------------------------------------------------------------------------------------------------------------------------------------------------------------------------------------------------------------------------------------------------------------------------------------------------------------------------------------------------------------------------------------------------------------------------------------------------------------------------------------------------------------------------------------------------------------------------------------------------------------------------------------------------------------------------------------|
| <b>1828</b>                                                                                                                                                                                                                                                                                                                                                                                                                                                                                                                                                                                                                                                                                                                                                                                                                                                                                         | <b>4726</b>                                                                                                                                                                                                                                                                                                                                                                                                                                                                                                                                                                                                                                                                                                                                                                                                                                                                                                                                                                                 | <b>3503</b>                                                                                                                                                                                                                                                                                                                                                                                                                                                                                                                                                                                                                                                         | <b>2127</b>                                                                                                                                                                                                                                                                                                                                                                                                                                                                                                                                                                                                                                                                                                                             |
| ("Alpha-linolenic acid"[Title/Abstract] OR "A-linolenic acid"[Title/Abstract] OR "Linoleate"[Title/Abstract] OR "Linoleic acid"[Title/Abstract] OR "Linoleate"[Title/Abstract] OR "Linoleic acid/alpha-linolenic acid"[Title/Abstract] OR "Linoleic acid/a-linolenic acid"[Title/Abstract] OR "Flaxseed"[Title/Abstract] OR "Linseed"[Title/Abstract] OR "Walnut"[Title/Abstract]) AND ("Glycosylated Hemoglobin"[Title/Abstract] OR "HbA1"[Title/Abstract] OR "HbA1c"[Title/Abstract] OR "Glycohemoglobin A"[Title/Abstract] OR "Glycated Hemoglobin"[Title/Abstract] OR "Blood Glucose"[Title/Abstract] OR "Blood Sugar"[Title/Abstract] OR "Hyperglycemia"[Title/Abstract] OR "Glycemia"[Title/Abstract] OR "HOMA"[Title/Abstract] OR "homeostatic model for insulin resistance"[Title/Abstract] OR "fasting blood insulin"[Title/Abstract] OR "FBI"[Title/Abstract] OR "FBG"[Title/Abstract] OR | ( TITLE-ABS-KEY ( "Glycated Hemoglobin A" ) OR TITLE-ABS-KEY ( "Blood Glucose" ) OR TITLE-ABS-KEY ( "Hyperglycemia" ) OR TITLE-ABS-KEY ( "Insulin Resistance" ) OR TITLE-ABS-KEY ( "Hyperinsulinism" ) OR TITLE-ABS-KEY ( "Diabetes Mellitus" ) OR TITLE-ABS-KEY ( "Glycosylated Hemoglobin" ) OR TITLE-ABS-KEY ( "HbA1" ) OR TITLE-ABS-KEY ( "Hb A1c" ) OR TITLE-ABS-KEY ( "Glycohemoglobin A" ) OR TITLE-ABS-KEY ( "Glycated Hemoglobin" ) OR TITLE-ABS-KEY ( "Blood Sugar" ) OR TITLE-ABS-KEY ( glycemia ) OR TITLE-ABS-KEY ( "HOMA" ) OR TITLE-ABS-KEY ( "homeostatic model for insulin resistance" ) OR TITLE-ABS-KEY ( "fasting blood insulin" ) OR TITLE-ABS-KEY ( "FBI" ) OR TITLE-ABS-KEY ( "FBG" ) OR TITLE-ABS-KEY ( "FBS" ) OR TITLE-ABS-KEY ( "Insulin Sensitivity" ) OR TITLE-ABS-KEY ( insulin ) OR TITLE-ABS-KEY ( hyperinsulin ) OR TITLE-ABS-KEY ( "Oral Glucose Tolerance Test" ) OR TITLE-ABS-KEY ( "OGTT" ) AND TITLE-ABS-KEY ( "alpha-linolenic acid" ) OR TITLE-ABS- | TS=("Alpha-linolenic acid" OR "A-linolenic acid" OR "Linoleate" OR "Linoleic acid" OR "Linoleate" OR "Linoleic acid/alpha-linolenic acid" OR "Linoleic acid/a-linolenic acid" OR "Flaxseed" OR "Linseed" OR "Walnut") AND TS=( "Glycated Hemoglobin A" OR "Blood Glucose" OR "Hyperglycemia" OR "Insulin Resistance" OR "Hyperinsulinism" OR "Diabetes Mellitus" OR "Glycosylated Hemoglobin" OR "HbA1" OR "Hb A1c" OR "Glycohemoglobin A" OR "Glycated Hemoglobin" OR "Blood Sugar" OR glycemia OR "HOMA" OR "homeostatic model for insulin resistance" OR "fasting blood insulin" OR "FBI" OR "FBG" OR "FBS" OR "Insulin Sensitivity" OR insulin OR "insulin*" OR | ('alpha-linolenic acid':ab,ti OR 'a-linolenic acid':ab,ti OR 'linoleic acid':ab,ti OR 'linoleate':ab,ti OR 'linoleic acid/alpha-linolenic acid':ab,ti OR 'linoleic acid/a-linolenic acid':ab,ti OR 'flaxseed':ab,ti OR 'linseed':ab,ti OR 'walnut':ab,ti) AND ('glycated hemoglobin a':ab,ti OR 'blood glucose':ab,ti OR 'hyperglycemia':ab,ti OR 'insulin resistance':ab,ti OR 'hyperinsulinism':ab,ti OR 'diabetes mellitus':ab,ti OR 'glycosylated hemoglobin':ab,ti OR 'hba1':ab,ti OR 'hb a1c':ab,ti OR 'glycohemoglobin a':ab,ti OR 'glycated hemoglobin':ab,ti OR 'blood sugar':ab,ti OR 'glycemia':ab,ti OR 'homa':ab,ti OR 'homeostatic model for insulin resistance':ab,ti OR 'fasting blood insulin':ab,ti OR 'fbi':ab,ti OR |

|                                                                                                                                                                                                                                                                                                                                                                                     |                                                                                                                                                                                                                                                                                                                                         |                                                                   |                                                                                                                                                                                                |
|-------------------------------------------------------------------------------------------------------------------------------------------------------------------------------------------------------------------------------------------------------------------------------------------------------------------------------------------------------------------------------------|-----------------------------------------------------------------------------------------------------------------------------------------------------------------------------------------------------------------------------------------------------------------------------------------------------------------------------------------|-------------------------------------------------------------------|------------------------------------------------------------------------------------------------------------------------------------------------------------------------------------------------|
| FBS[Title/Abstract] OR "Insulin<br>Resistance"[Title/Abstract] OR "Insulin<br>Sensitivity"[Title/Abstract] OR<br>"Hyperinsulinemia"[Title/Abstract] OR<br>Hyperinsulinism[Title/Abstract] OR Insulin<br>[Title/Abstract] OR Hyperinsulin<br>[Title/Abstract] OR "Oral Glucose Tolerance<br>Test"[Title/Abstract] OR OGTT[Title/Abstract]<br>OR "Diabetes Mellitus"[Title/Abstract]) | KEY ( "A-linolenic acid" ) OR TITLE-ABS-KEY<br>( "Linoleate" ) OR TITLE-ABS-KEY ( "Linoleic<br>acid" ) OR TITLE-ABS-KEY ( "Linoleic<br>acid/alpha-linolenic acid" ) OR TITLE-ABS-<br>KEY ( "Linoleic acid/a-linolenic acid" ) OR<br>TITLE-ABS-KEY ( "Flaxseed" ) OR TITLE-ABS-<br>KEY ( "Linseed" ) OR TITLE-ABS-KEY ( "<br>Walnut" ) ) | "hyperinsulin*" OR "Oral<br>Glucose Tolerance Test" OR<br>"OGTT") | 'fbg':ab,ti OR 'fbs':ab,ti OR 'insulin<br>sensitivity':ab,ti OR insulin:ab,ti<br>OR 'insulin*':ab,ti OR<br>'hyperinsulin*':ab,ti OR 'oral<br>glucose tolerance test':ab,ti OR<br>'ogtt':ab,ti) |
|-------------------------------------------------------------------------------------------------------------------------------------------------------------------------------------------------------------------------------------------------------------------------------------------------------------------------------------------------------------------------------------|-----------------------------------------------------------------------------------------------------------------------------------------------------------------------------------------------------------------------------------------------------------------------------------------------------------------------------------------|-------------------------------------------------------------------|------------------------------------------------------------------------------------------------------------------------------------------------------------------------------------------------|

**Supplementary Table S2.** Dietary intakes of nutrient of the participants at intervention period.

| Reference                    | Group       | Energy<br>(kcal/d)   | Protein | Carboh<br>ydrate | Fat   | SFA                | MUFA               | PUFA               | Total<br>LA        | Total<br>ALA      | LA and ALA Source                                |
|------------------------------|-------------|----------------------|---------|------------------|-------|--------------------|--------------------|--------------------|--------------------|-------------------|--------------------------------------------------|
| (% of total energy intake/d) |             |                      |         |                  |       |                    |                    |                    |                    |                   |                                                  |
| Akrami2018                   | Low LA/ALA  | 2481                 | 15.1    | 56.3             | 28.4  | 7.5                | 3.6                | 17.3 <sup>b</sup>  | 2.1 <sup>a</sup>   | 15.2 <sup>b</sup> | 25 ml flaxseed oil                               |
|                              | High LA/ALA | 2490                 | 14.8    | 56.2             | 28.8  | 7.6                | 4.7                | 16.5 <sup>a</sup>  | 15.68 <sup>b</sup> | 0.82 <sup>a</sup> | 25 ml sunflower oil                              |
| Bemelmans2002                | Low LA/ALA  | 2796.3               |         |                  | 37.7  | 13.5               | 12.1               | 12.1               | 9.5                | 2.3 <sup>b</sup>  | ALA-rich margarine                               |
|                              | High LA/ALA | 2796.3               |         |                  | 37.7  | 13.5               | 12.1               | 12.1               | 10.6               | 0.4 <sup>a</sup>  | LA-rich margarine                                |
| Chen2020                     | Low LA/ALA  | 2248.2               | 16.3    | 52.0             | 31.7  | 7.2                | 11.9               | 7.5                | 7.1                | 1.0 <sup>b</sup>  | 27 g blend oil                                   |
|                              | High LA/ALA | 2161.4               | 16.1    | 53.4             | 30.5  | 7.4                | 11.3               | 6.8                | 6.3                | 0.21 <sup>a</sup> | 27 g peanut oil                                  |
|                              | High LA/ALA | 2072.3               | 15.5    | 54.6             | 29.8  | 7.2                | 9.4                | 8.4                | 7.8                | 0.39 <sup>a</sup> | 27 g corn oil                                    |
| Damsgaard2008                | Low LA/ALA  | 2722                 | 15      | 48               | 36    | 12.2               | 13.2               | 5 <sup>a</sup>     | 4.07 <sup>a</sup>  | 0.86              | 10.3 g (0.0-52.5g/d) rapeseed oil                |
|                              | High LA/ALA | 2654.6               | 14      | 51               | 35    | 10.5               | 11.5               | 7.5 <sup>b</sup>   | 6.54 <sup>b</sup>  | 0.85              | 10.3 g (0.0-52.5g/d) sunflower oil               |
| Finnegan2003                 | Low LA/ALA  | 2342.2 <sup>a</sup>  | 15.5    | 45.3             | 36    | 11.5               | 10.1               | 8.4                | 6.22 <sup>a</sup>  | 1.73 <sup>b</sup> | 25 g ALA margarine (rapeseed and linseed oils)   |
|                              | Low LA/ALA  | 2485.6 <sup>ab</sup> | 15.4    | 43.7             | 37.8  | 12.3               | 10.9               | 8.8                | 4.74 <sup>a</sup>  | 3.44 <sup>c</sup> | 25 g ALA margarine (rapeseed and linseed oils)   |
|                              | High LA/ALA | 2891.9 <sup>b</sup>  | 16.1    | 43.3             | 36.2  | 11.9               | 10.5               | 8.2                | 7.13 <sup>b</sup>  | 0.47 <sup>a</sup> | 25 g LA margarine (sunflower and safflower oils) |
| Griffin2006                  | Low LA/ALA  | 2093.6               | 16.4    | 42.3             | 36.1  | 11.5               | 14.2               | 6.8 <sup>a</sup>   | 5.1 <sup>a</sup>   | 1.1 <sup>b</sup>  | 32 g rapeseed oil                                |
|                              | High LA/ALA | 2148.6               | 16.4    | 41.0             | 37.4  | 12.2               | 14.4               | 8.2 <sup>b</sup>   | 7 <sup>b</sup>     | 0.5 <sup>a</sup>  | 32 g high-oleic sunflower oil                    |
| Kalgaonkar2011               | Low LA/ALA  | 1541.1 <sup>a</sup>  | 17      | 45               | 40    | 18.69 <sup>b</sup> | 11.10 <sup>a</sup> | 10.66 <sup>b</sup> | 8.76 <sup>b</sup>  | 1.90 <sup>b</sup> | 31 g walnut-oil                                  |
|                              | High LA/ALA | 1718.2 <sup>b</sup>  | 19      | 44               | 39    | 15.19 <sup>a</sup> | 18.33 <sup>b</sup> | 4.11 <sup>a</sup>  | 3.93 <sup>a</sup>  | 0.18 <sup>a</sup> | 31 g almond-oil                                  |
| Kawakami2015                 | Low LA/ALA  | 2261.4               | 13.02   | 55.75            | 25.51 |                    |                    |                    | 8.11 <sup>a</sup>  | 6.03 <sup>b</sup> | 10 g flaxseed oil                                |
|                              | High LA/ALA | 2289.8               | 13.33   | 53.51            | 28.42 |                    |                    |                    | 15.68 <sup>b</sup> | 1.6 <sup>a</sup>  | 10 g corn oil                                    |
| Kontogianni2013              | Low LA/ALA  | 1929.2               | 15.9    | 44.2             | 37.0  | 12.3               | 14.5 <sup>a</sup>  | 8.4 <sup>b</sup>   |                    | 4.06 <sup>b</sup> | 15 ml flaxseed oil                               |

|              |             |        |      |        |                 |       |                   |                    |                    |                            |                            |                                                                                                                                                               |
|--------------|-------------|--------|------|--------|-----------------|-------|-------------------|--------------------|--------------------|----------------------------|----------------------------|---------------------------------------------------------------------------------------------------------------------------------------------------------------|
|              | High LA/ALA | 1806.1 | 18.4 | 47.6   | 39.0            | 12.0  | 17.6 <sup>b</sup> | 6.0 <sup>a</sup>   |                    | 0.40 <sup>a</sup>          | 15 ml olive oil            |                                                                                                                                                               |
| Kratz2002    | Low LA/ALA  | 2318.3 | 14.4 | 46.9   | 38.8            | 10.7  | 23.3 <sup>b</sup> | 3.4 <sup>a</sup>   | 3 <sup>a</sup>     | 0.4 <sup>a</sup>           | Olive oil diet             |                                                                                                                                                               |
|              | Low LA/ALA  | 2574.0 | 14.3 | 47.3   | 38.4            | 9.1   | 19 <sup>b</sup>   | 8.9 <sup>b</sup>   | 6.4 <sup>b</sup>   | 2.5 <sup>b</sup>           | Rapeseed oil diet          |                                                                                                                                                               |
|              | High LA/ALA | 2538.2 | 14.2 | 47.6   | 38.2            | 10    | 8.7 <sup>a</sup>  | 18.4 <sup>c</sup>  | 18.1 <sup>c</sup>  | 0.3 <sup>a</sup>           | Sunflower oil diet         |                                                                                                                                                               |
| Lee2014      | Low LA/ALA  |        |      |        |                 |       |                   |                    |                    | 1.8 <sup>a</sup>           | 1.9 <sup>b</sup>           | 7 echium oil capsules and 3 borage oil capsules                                                                                                               |
|              | High LA/ALA |        |      |        |                 |       |                   |                    |                    | 3.96 <sup>b</sup>          | 0.06 <sup>a</sup>          | 9 corn oil capsules                                                                                                                                           |
| Ma2010       | Low LA/ALA  | 1765   | 17   | 39     | 45 <sup>b</sup> | 10.88 | 9.18              | 16.83 <sup>b</sup> | 13.26 <sup>b</sup> | 2.96 <sup>b</sup>          |                            | 56 g of shelled, unroasted English walnuts                                                                                                                    |
|              | High LA/ALA | 1685   | 19   | 43     | 38 <sup>a</sup> | 12.52 | 9.61              | 4.91 <sup>a</sup>  | 3.31 <sup>a</sup>  | 0.43 <sup>a</sup>          |                            | Ad libitum diet without walnuts                                                                                                                               |
| McManus1996  | Low LA/ALA  |        |      |        |                 |       |                   |                    |                    | 14.2% of total fatty acids | 57.5% of total fatty acids | 35 mg/kg body weight flaxseed oil                                                                                                                             |
|              | High LA/ALA |        |      |        |                 |       |                   |                    |                    | 13% of total fatty acids   | 0.9% of total fatty acids  | 35 mg/kg body weight olive oil                                                                                                                                |
| Minihane2005 | Low LA/ALA  |        |      |        | 39              | 9     | 15 <sup>b</sup>   | 5.7 <sup>a</sup>   | 5 <sup>a</sup>     | 0.7                        |                            | olive oil                                                                                                                                                     |
|              | High LA/ALA |        |      |        | 37              | 10    | 10 <sup>a</sup>   | 10.7 <sup>b</sup>  | 10 <sup>b</sup>    | 0.7                        |                            | coin oil                                                                                                                                                      |
| Moszak2020   | Low LA/ALA  |        | 20%  | 50-55% | 25-30%          |       |                   |                    |                    | 4.2 <sup>a</sup>           | 2.24 <sup>b</sup>          | 20 ml rapeseed oil                                                                                                                                            |
|              | High LA/ALA |        | 20%  | 50-55% | 25-30%          |       |                   |                    |                    | 9.98 <sup>b</sup>          | 0.24 <sup>a</sup>          | 20 ml amaranth seed oil                                                                                                                                       |
| Nelson2007   | Low LA/ALA  | 1924.3 |      |        | 38.6            | 10.6  | 13.1              | 12.1               | 6.8                | 5.3 <sup>b</sup>           |                            | Subjects increased ALA intake to 5% of                                                                                                                        |
|              | High LA/ALA | 2062.9 |      |        | 35.8            | 12.2  | 13.8              | 7.1                | 6.12               | 0.6 <sup>a</sup>           |                            | total energy via flaxseed oil capsule. Subjects were advised to decrease their intake of high-fat foods, whole and 2% milk products, and added fats. Subjects |

|               |             |        |                   |                   |                   |                   |                   |                   |                    |                    | were also provided lists of lower-fat alternatives to these foods. |
|---------------|-------------|--------|-------------------|-------------------|-------------------|-------------------|-------------------|-------------------|--------------------|--------------------|--------------------------------------------------------------------|
| Rezaei2020    | Low LA/ALA  | 1807   | 66.30             | 13.17             | 20.77             | 6.18              | 5.58              | 8.82              | 3.62 <sup>a</sup>  | 9.96 <sup>b</sup>  | 20 g flaxseed oil                                                  |
|               | High LA/ALA | 1781   | 63.83             | 13.32             | 22.99             | 6.52              | 6.77              | 9.75              | 12.68 <sup>b</sup> | 0.044 <sup>a</sup> | 20 g sunflower oil                                                 |
| Schwab2018    | Low LA/ALA  | 2215.5 | 15.6 <sup>a</sup> | 38.2 <sup>a</sup> | 42.5 <sup>b</sup> | 12.1              | 15.0              | 11.6 <sup>b</sup> | 5.48 <sup>b</sup>  | 5.04 <sup>b</sup>  | 27 g camelina sativa oil and canola oil                            |
|               | High LA/ALA | 1938.5 | 17.7 <sup>b</sup> | 42.5 <sup>b</sup> | 34.0 <sup>a</sup> | 11.3              | 13.1              | 5.6 <sup>a</sup>  | 4.18 <sup>a</sup>  | 0.97 <sup>a</sup>  | 27 g canola oil and olive oil                                      |
| Sodergren2001 | Low LA/ALA  | 2127.1 | 14.8              | 47.3              | 35.9              | 10.3 <sup>a</sup> | 15.7 <sup>b</sup> | 7.5 <sup>b</sup>  | 5.4 <sup>b</sup>   | 1.8 <sup>b</sup>   | Rapeseed oil provide 27% of total energy                           |
|               | High LA/ALA | 2318.3 | 14.4              | 47.5              | 36.2              | 17.6 <sup>b</sup> | 10.9 <sup>a</sup> | 4.6 <sup>a</sup>  | 4.0 <sup>a</sup>   | 0.4 <sup>a</sup>   | Butter and olive oil provide 27% of total energy                   |
| Vargas2011    | Low LA/ALA  | 1735   | 16.9              | 48.2              | 34.8              |                   |                   | 4.6               | 2.66 <sup>a</sup>  | 1.93 <sup>b</sup>  | 6 capsules flaxseed oil                                            |
|               | High LA/ALA | 1735   | 16.9              | 48.2              | 34.8              |                   |                   | 3.91              | 3.51 <sup>b</sup>  | 0.39 <sup>a</sup>  | 6 capsules soybean oil                                             |
| Zhou2019      | Low LA/ALA  | 1927   |                   |                   | 33.72             | 7.89              | 10.13             | 11.44             | 7.85               | 3.82 <sup>c</sup>  | 25 ml flaxseed oil and corn oil                                    |
|               | Low LA/ALA  | 1917   |                   |                   | 33.57             | 8.12              | 10.42             | 11.60             | 8.92               | 2.35 <sup>b</sup>  | 25 ml flaxseed oil and corn oil                                    |
|               | High LA/ALA | 1960   |                   |                   | 34.35             | 8.17              | 11.53             | 10.7              | 9.87               | 0.62 <sup>a</sup>  | 25 ml corn oil                                                     |

SFA, saturated fatty acids; MUFA, monounsaturated fatty acids; PUFA, polyunsaturated fatty acids; LA, linoleic acid; ALA,  $\alpha$ -linolenic acid; Different letters indicate significant differences ( $p < 0.05$ ) between each group, and the same letters indicate that there is no significant difference ( $p > 0.05$ ) between each group.

**Supplementary Table S3.** Quality assessment of the included studies.

| Study            | Random<br>Sequence<br>Generation | Allocation<br>Concealment | Blinding of<br>Participants and<br>Personnel | Blinding of<br>Outcome<br>Assessments | Incomplete<br>Outcome Data | Selective<br>Outcome<br>Reporting | Other Bias |
|------------------|----------------------------------|---------------------------|----------------------------------------------|---------------------------------------|----------------------------|-----------------------------------|------------|
| Akrami2018       | L                                | U                         | U                                            | U                                     | L                          | L                                 | L          |
| Bemelmans2002    | L                                | L                         | L                                            | U                                     | L                          | U                                 | L          |
| Chen2020         | L                                | L                         | L                                            | U                                     | L                          | U                                 | L          |
| Damsgaard 2008   | L                                | L                         | L                                            | L                                     | L                          | L                                 | L          |
| Finnegan2003     | L                                | U                         | L                                            | U                                     | L                          | U                                 | L          |
| Griffin2006      | U                                | U                         | U                                            | U                                     | U                          | U                                 | L          |
| Kalgaonkar2011   | L                                | L                         | L                                            | L                                     | L                          | L                                 | L          |
| Kawakami 2015    | U                                | U                         | L                                            | U                                     | L                          | U                                 | L          |
| Kontogianni 2013 | L                                | L                         | H                                            | U                                     | L                          | U                                 | L          |
| Kratz2002        | U                                | U                         | U                                            | U                                     | U                          | U                                 | U          |
| Lee 2014         | U                                | U                         | H                                            | U                                     | L                          | U                                 | L          |
| Ma 2010          | U                                | U                         | L                                            | L                                     | L                          | L                                 | L          |
| McManus1996      | L                                | U                         | L                                            | L                                     | L                          | U                                 | L          |
| Minihane2005     | U                                | U                         | L                                            | U                                     | L                          | U                                 | L          |
| Moszak2020       | U                                | U                         | L                                            | L                                     | L                          | U                                 | L          |
| Nelson2007       | U                                | U                         | U                                            | L                                     | L                          | L                                 | L          |
| Rezaei2020       | L                                | L                         | L                                            | U                                     | L                          | L                                 | L          |
| Schwab2018       | L                                | U                         | U                                            | L                                     | L                          | U                                 | L          |
| Sodergren2001    | U                                | U                         | U                                            | U                                     | U                          | U                                 | L          |
| Vargas2011       | U                                | U                         | L                                            | U                                     | U                          | U                                 | U          |
| Zhou2019         | U                                | U                         | L                                            | U                                     | L                          | L                                 | L          |

H: high risk of bias; U: unclear risk of bias; L: low risk of bias.
