# Supplementary material for: The Effect of Plant-Derived Low-Ratio Linoleic Acid/α-Linolenic Acid on Markers of Glucose Controls: A Systematic Review and Meta-Analysis
Source: MDPI journal article supplement (doi:10.3390/ijms241814383), 2023-09-21
Supplement: s1 [file s1]

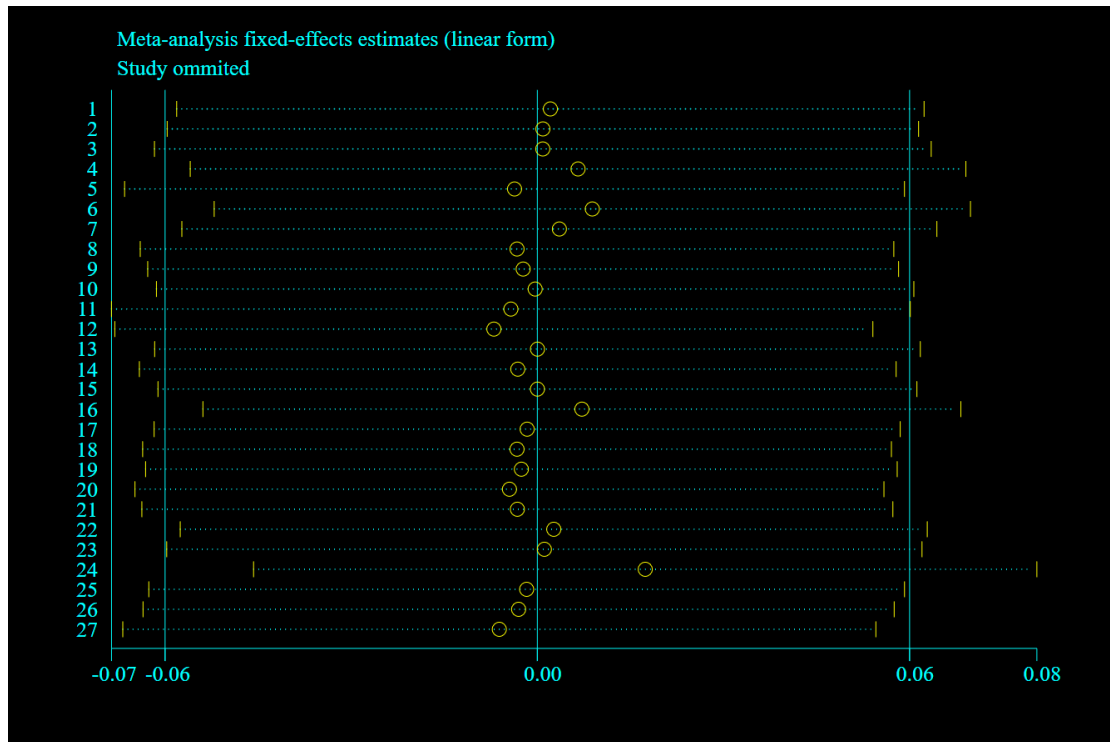

**Supplementary Figure S1.** Sensitivity analysis of low-ratio LA/ALA and FBS.

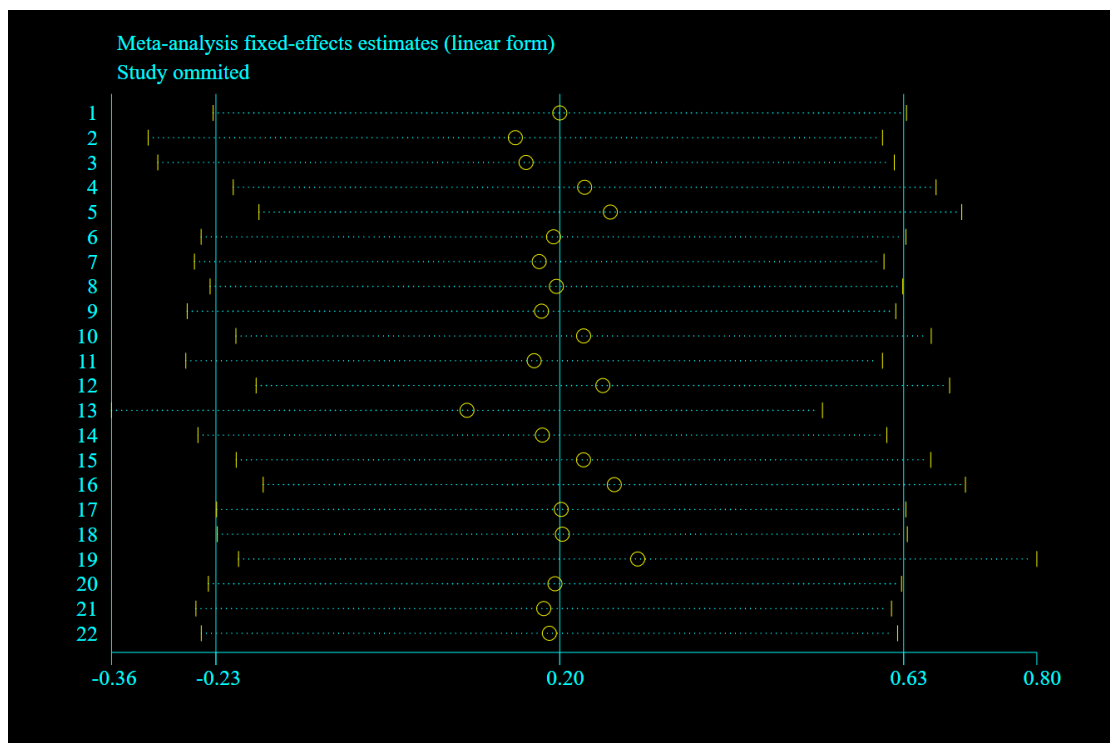

**Supplementary Figure S2.** Sensitivity analysis of low-ratio LA/ALA and insulin.

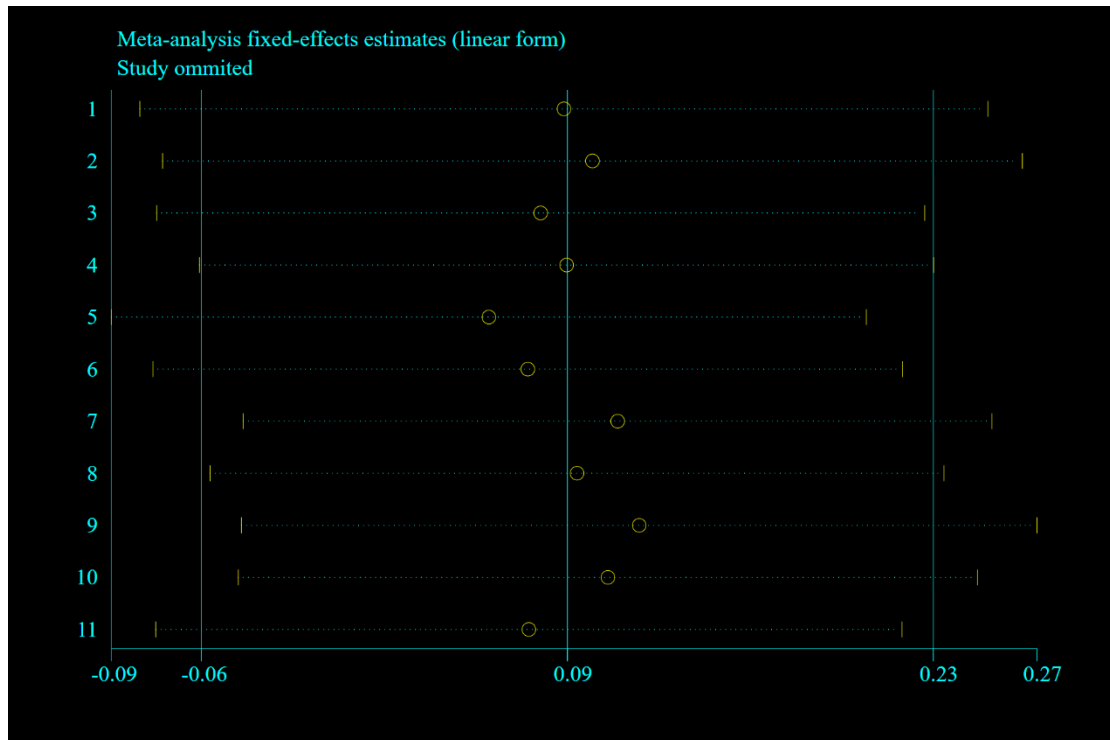

**Supplementary Figure S3.** Sensitivity analysis of low-ratio LA/ALA and HOMA-IR.

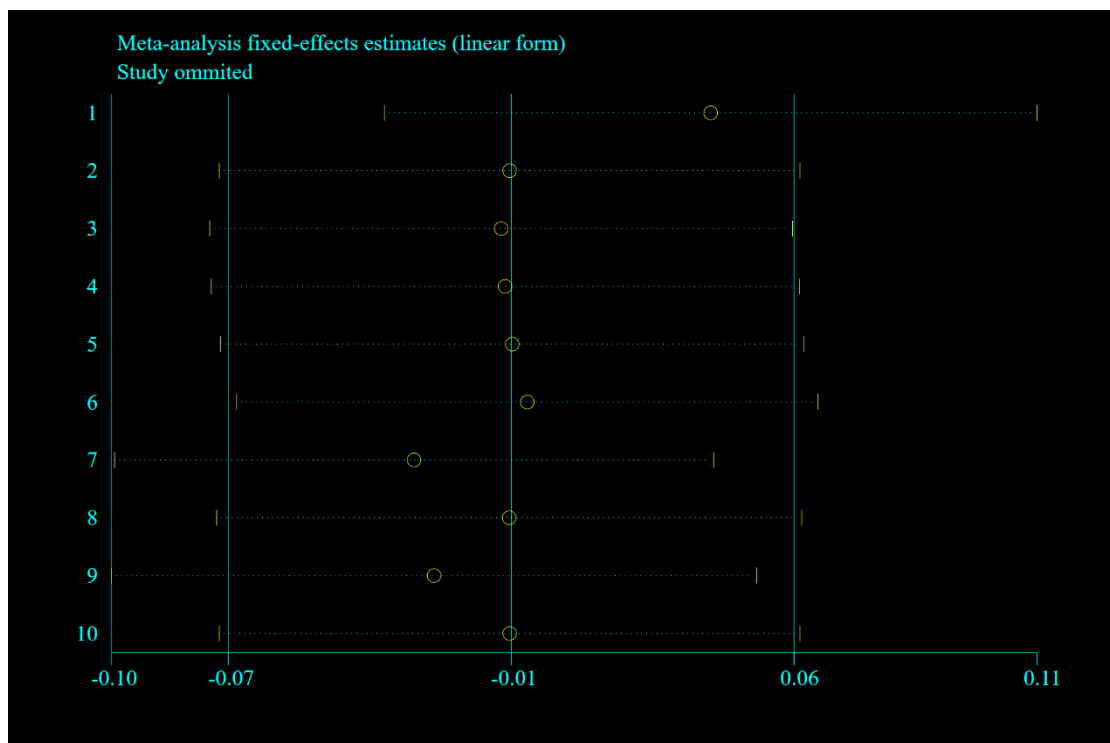

**Supplementary Figure S4.** Sensitivity analysis of low-ratio LA/ALA and HbA1c.

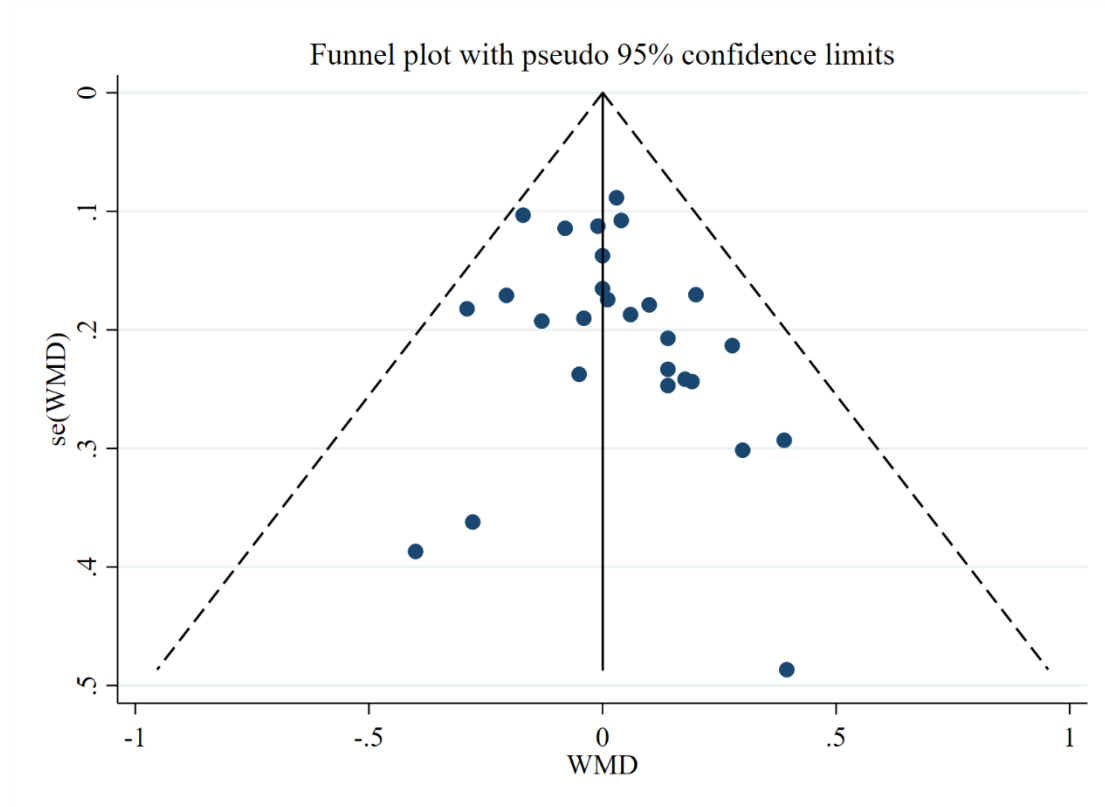

**Supplementary Figure S5.** Funnel plots of low-ratio LA/ALA and FBS.

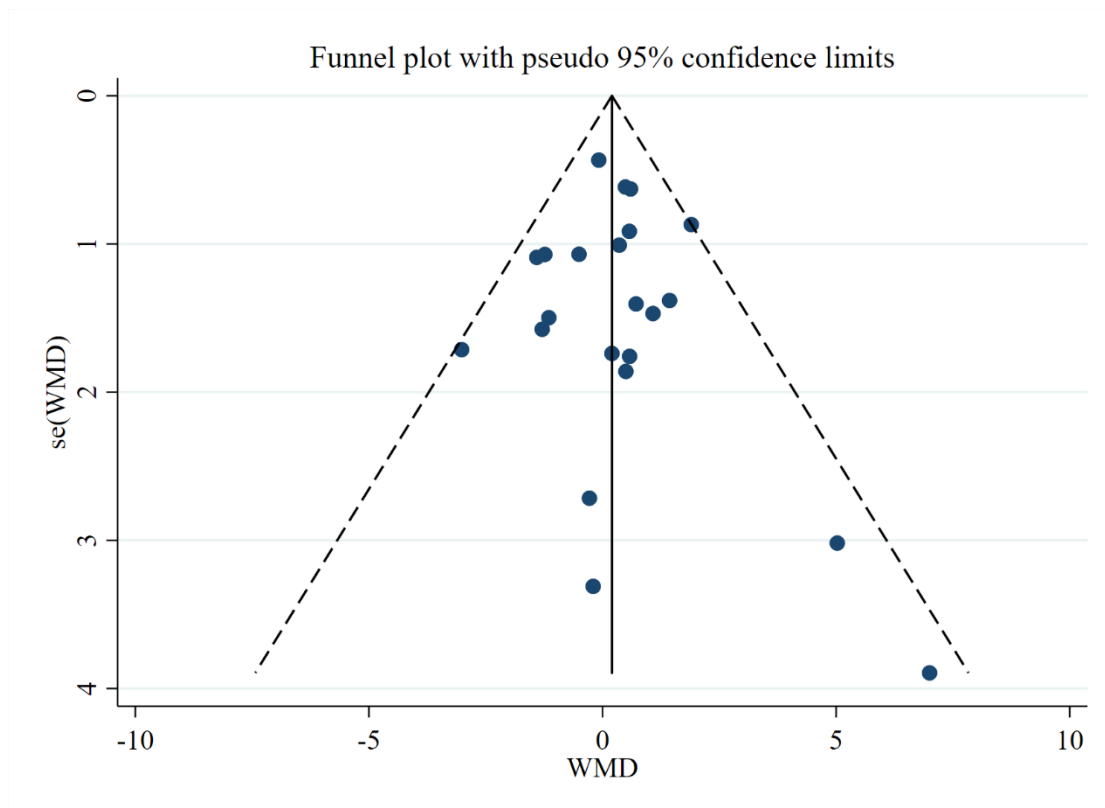

**Supplementary Figure S6.** Funnel plots of low-ratio LA/ALA and insulin.

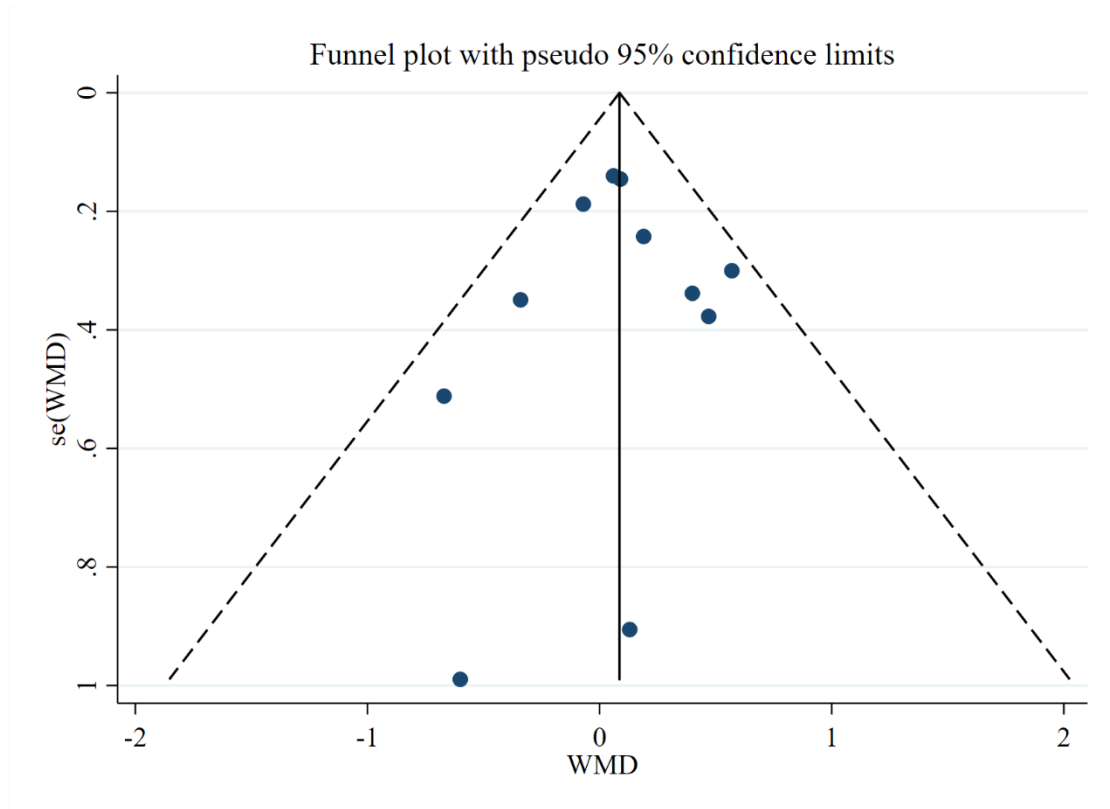

**Supplementary Figure S7.** Funnel plots of low-ratio LA/ALA and HOMA-IR.

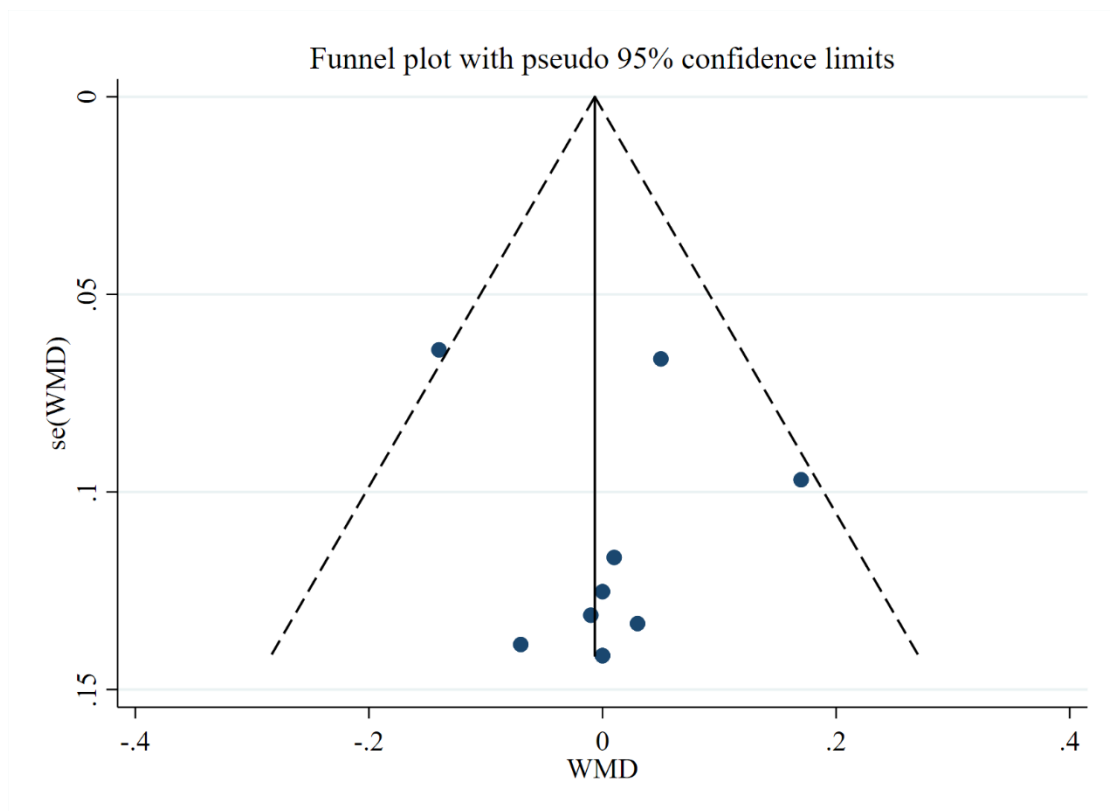

**Supplementary Figure S8.** Funnel plots of low-ratio LA/ALA and HbA1c.
